# Supplementary material for: Simultaneous determination of iodide and creatinine in human urine by flow analysis with an on-line sample treatment column
Source: Royal Society of Chemistry journal article supplement (doi:10.1039/c4an01224k), 2014-10-13
Supplement: c4an01224k1.pdf [file c4an01224k1.pdf]

Electronic Supplementary Information

**Simultaneous determination of iodide and creatinine in human urine by flow analysis  
with an on-line sample treatment column**

Jirayu Sitanurak<sup>ab</sup>, Prawpan Inpota<sup>ab</sup>, Thitirat Mantim<sup>ab</sup>, Nuanlaor Ratanawimarnwong<sup>ac</sup>,  
Prapin Wilairat<sup>ad</sup> and Duangjai Nacapricha<sup>\*ab</sup>

*<sup>a</sup>Flow Innovation-Research for Science and Technology Laboratories (Firstlabs)*

*<sup>b</sup>Department of Chemistry and Center of Excellence for Innovation in Chemistry,  
Faculty of Science, Mahidol University, Bangkok 10400, Thailand*

*<sup>c</sup>Department of Chemistry, Faculty of Science, Srinakharinwirot University, Sukhumwit 23,  
Bangkok 10110, Thailand*

*<sup>d</sup>National Doping Control Centre, Mahidol University, Rama VI Rd, Bangkok 10400,  
Thailand*

*\*Author to whom correspondence should be addressed*

*Tel.: +66 2 201 5127, fax: +66 2 201 5127*

*E-mail address: [duangjai.nac@mahidol.ac.th](mailto:duangjai.nac@mahidol.ac.th) and [dnacapricha@gmail.com](mailto:dnacapricha@gmail.com)*

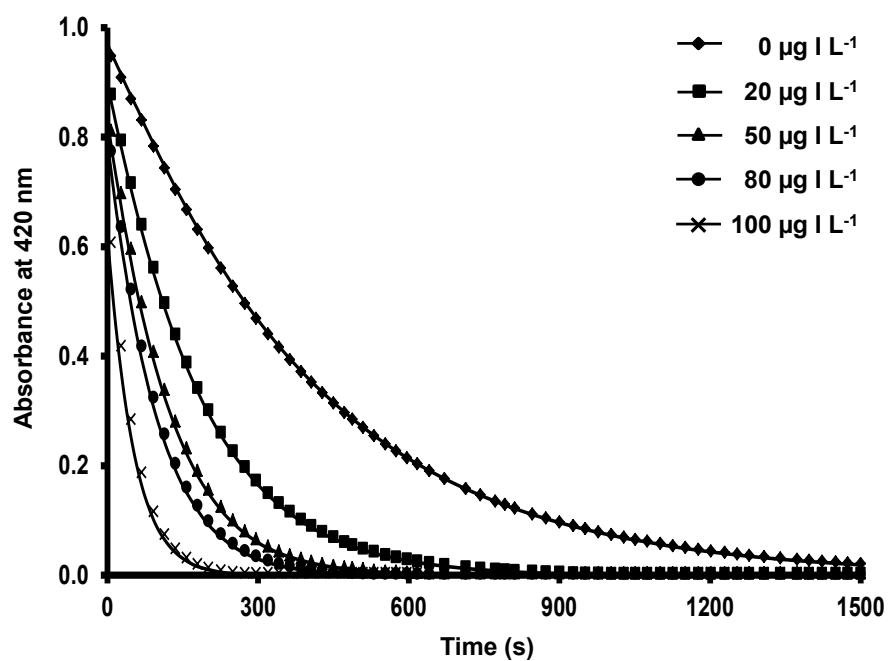

**Fig. S1** Kinetics profile obtained from stopped-flow mode, showing decrease in absorbance of Ce(IV) at various concentrations of iodide dissolved in 5 M  $\text{NaNO}_3$ .

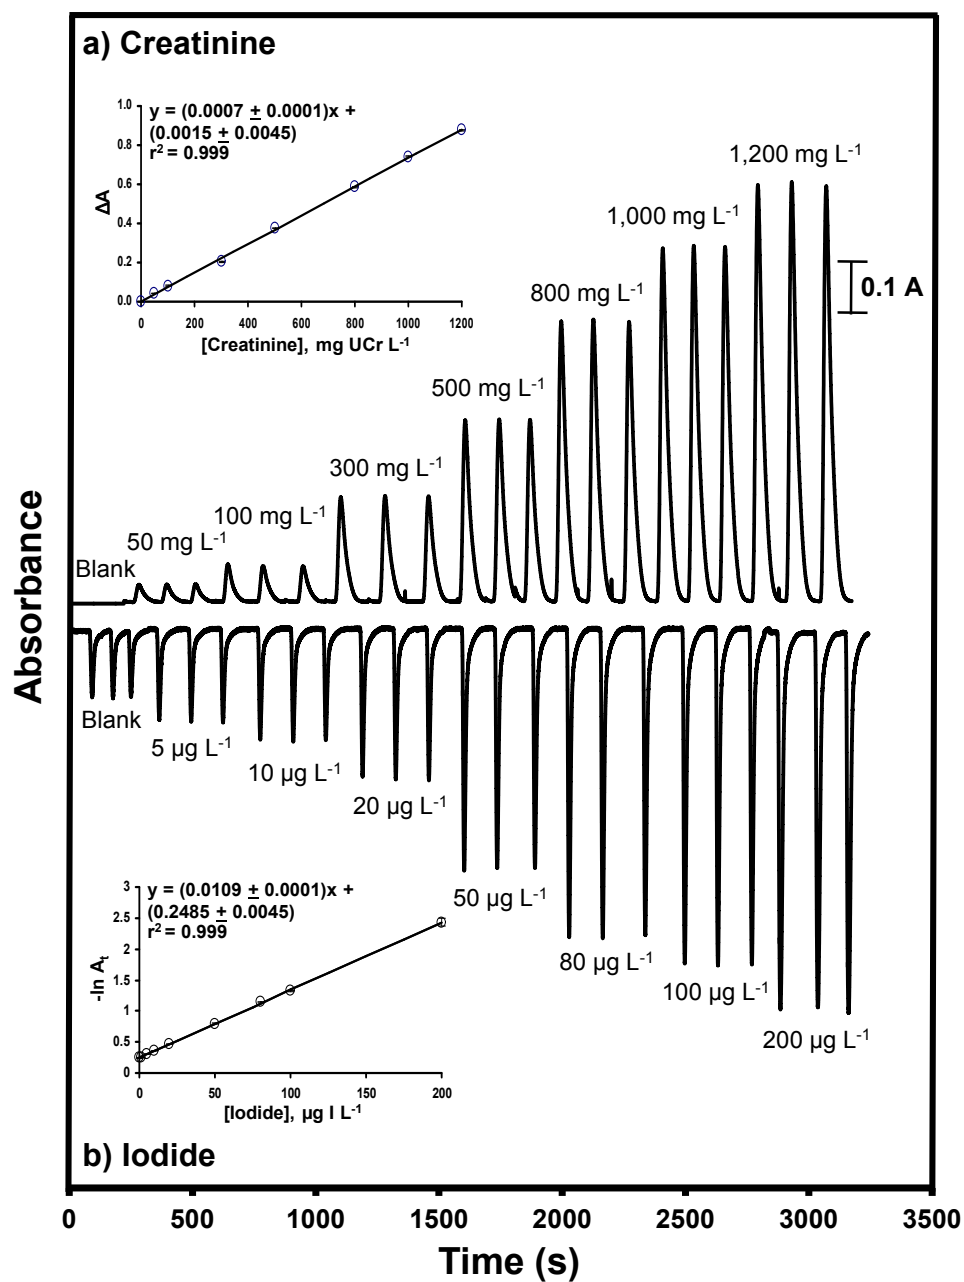

**Fig. S2** Recording of signals and calibration curves obtained from the proposed flow system for simultaneous measurement of (a) urinary creatinine and (b) iodide.

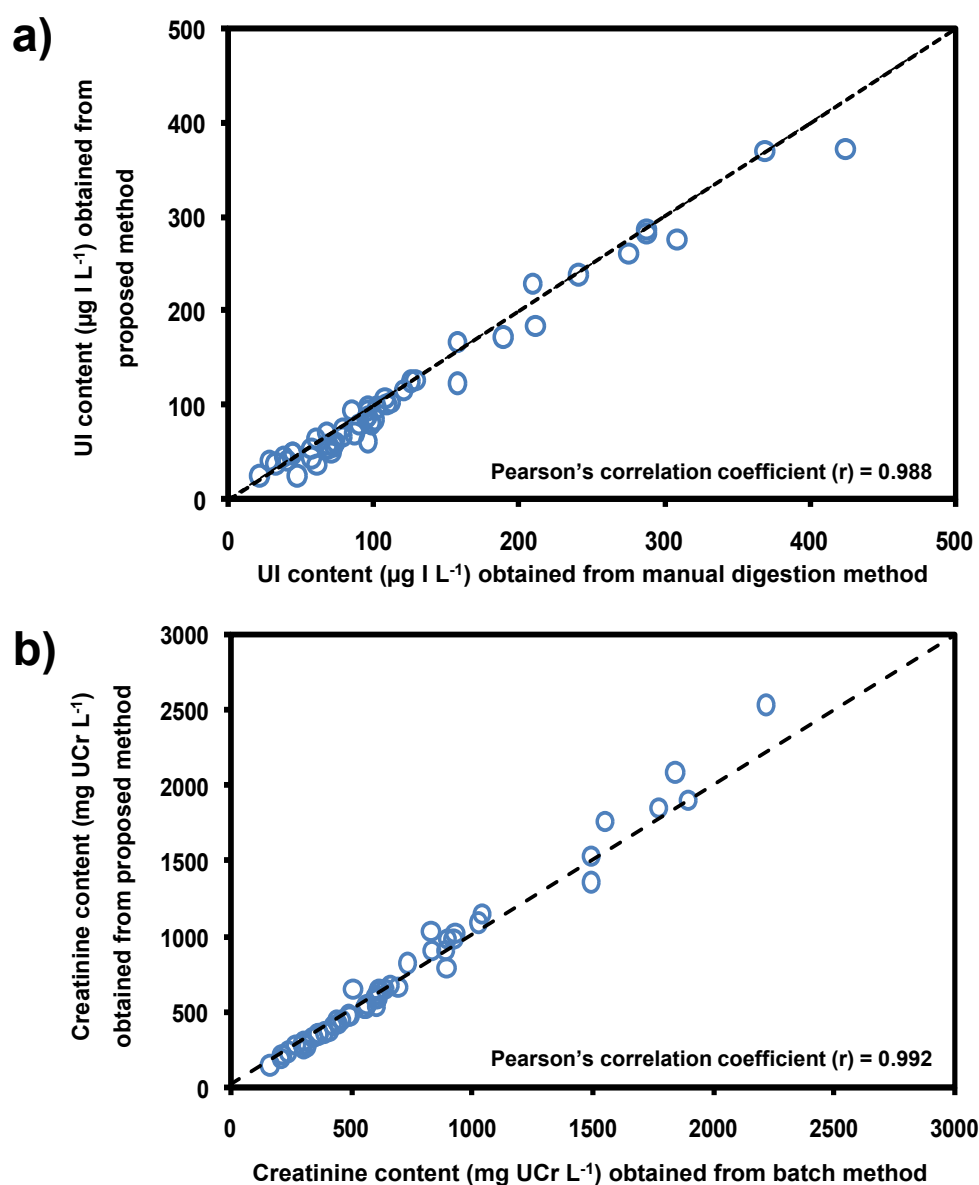

**Fig. S3** Pearson's linear plot for statistical comparison of two analytical methods. (a) The proposed method and manual chloric acid digestion with flow kinetic detection for UI analysis<sup>19</sup> and (b) proposed method and batch method using Jaffe's reaction for creatinine determination.<sup>29</sup> Linear regression equation for iodine:  $y = (0.947 \pm 0.021)x - (0.119 \pm 3.173)$ ,  $r^2 = 0.984$  and for creatinine:  $y = (1.098 \pm 0.020)x - (35.32 \pm 17.40)$ ,  $r^2 = 0.984$ ,  $n = 50$ . The ideal correlation line ( $y = x$ ) is shown by the dashed line.
